# Supplementary material for: Control and regulation of the performance of fullerene-based dye-sensitized solar cells with a D–D–A structure by external electric fields
Source: Royal Society of Chemistry journal article supplement (doi:10.1039/d3na00115f), 2023-01-01
Supplement: d3na00115f1.pdf [file d3na00115f1.pdf]

**Supporting Information for**  
**Control and regulation of the performance of fullerene-**  
**based dye-sensitized solar cells with D-D-A structure by**  
**external electric fields**

Xinyue Wang<sup>a</sup>, Cong Shen<sup>a</sup>, Jingping Li<sup>a</sup>, Meixia Zhang<sup>a,\*</sup> and Peng Song<sup>a,\*</sup>

<sup>a</sup> College of Physics, Liaoning University, Shenyang 110036, China.

<sup>b</sup> Department of Chemical Physics, Lund University, Box 124, Lund 22100, Sweden

\* Corresponding authors. E-mail: [songpeng@lnu.edu.cn](mailto:songpeng@lnu.edu.cn), Tel: +86-24-62202306 (P.Song), E-mail: [ldzmx@sina.com](mailto:ldzmx@sina.com) (M.X. Zhang)

**Table S1.** Dipole moment of the molecule in  $F_{\text{ext}}$  ( $F_{\text{ext}}$  in  $10^{-5}$  a.u.).

|                                       | $F_{\text{ext}}=-10$ | $F_{\text{ext}}=0$ | $F_{\text{ext}}=10$ |
|---------------------------------------|----------------------|--------------------|---------------------|
| Dipole moment of the molecule (Debye) | 9.9197               | 10.6164            | 11.3247             |

**Table S2.** Electronic transition energy ( $\Delta E$ ), absorption wavelength( $\lambda_{\text{max}}$ ) and oscillator strength ( $f$ ) of Dye molecule.

| <i>State</i> | $\Delta E/\text{eV}$ | $\lambda_{\text{max}}/\text{nm}$ | $f$    |
|--------------|----------------------|----------------------------------|--------|
| 1            | 2.3308               | 531.94                           | 0.0057 |
| 2            | 2.4245               | 511.38                           | 0.0001 |
| 3            | 2.4573               | 504.55                           | 0.0000 |
| 4            | 2.4825               | 499.44                           | 0.0000 |
| 5            | 2.6868               | 461.45                           | 0.0007 |
| 6            | 2.7326               | 453.72                           | 0.0205 |
| 7            | 2.7382               | 452.79                           | 0.1752 |
| 8            | 2.7440               | 451.83                           | 0.3707 |
| 9            | 2.7838               | 445.38                           | 0.0005 |
| 10           | 2.8781               | 430.79                           | 0.0035 |
| 11           | 2.9357               | 422.34                           | 0.0060 |
| 12           | 2.9515               | 420.07                           | 1.5667 |
| 13           | 2.9724               | 417.12                           | 0.0014 |
| 14           | 2.9979               | 413.57                           | 0.0004 |
| 15           | 3.0277               | 409.50                           | 0.5095 |
